# Supplementary material for: Protocol for a systematic review of economic evaluations conducted on gender-transformative interventions aimed at preventing unintended pregnancy and promoting sexual health in adolescents
Source: HighWire-hosted journal article supplement (doi:10.1136/bmjopen-2021-056553), 2022-05-01
Supplement: bmjopen-2021-056553supp001_data_supplement.pdf [file bmjopen-2021-056553supp001_data_supplement.pdf]

**APPENDIX 1****PRISMA-P 2015 Checklist**

| Section/topic                     | #  | Checklist item                                                                                                                                                                                  | Information reported     |                          | Page number(s)                                 |
|-----------------------------------|----|-------------------------------------------------------------------------------------------------------------------------------------------------------------------------------------------------|--------------------------|--------------------------|------------------------------------------------|
|                                   |    |                                                                                                                                                                                                 | Yes                      | No                       |                                                |
| <b>ADMINISTRATIVE INFORMATION</b> |    |                                                                                                                                                                                                 |                          |                          |                                                |
| <b>Title</b>                      |    |                                                                                                                                                                                                 |                          |                          |                                                |
| Identification                    | 1a | Identify the report as a protocol of a systematic review                                                                                                                                        | ✓                        | <input type="checkbox"/> | 1                                              |
| Update                            | 1b | If the protocol is for an update of a previous systematic review, identify as such                                                                                                              | <input type="checkbox"/> | <input type="checkbox"/> | n/a                                            |
| <b>Registration</b>               | 2  | If registered, provide the name of the registry (e.g., PROSPERO) and registration number in the Abstract                                                                                        | ✓                        | <input type="checkbox"/> | PROSPERO<br>Registration<br>CRD4202126<br>4698 |
| <b>Authors</b>                    |    |                                                                                                                                                                                                 |                          |                          |                                                |
| Contact                           | 3a | Provide name, institutional affiliation, and e-mail address of all protocol authors; provide physical mailing address of corresponding author                                                   | ✓                        | <input type="checkbox"/> | 1                                              |
| Contributions                     | 3b | Describe contributions of protocol authors and identify the guarantor of the review                                                                                                             | ✓                        | <input type="checkbox"/> | 14                                             |
| <b>Amendments</b>                 | 4  | If the protocol represents an amendment of a previously completed or published protocol, identify as such and list changes; otherwise, state plan for documenting important protocol amendments | <input type="checkbox"/> | <input type="checkbox"/> | n/a                                            |
| <b>Support</b>                    |    |                                                                                                                                                                                                 |                          |                          |                                                |
| Sources                           | 5a | Indicate sources of financial or other support for the review                                                                                                                                   | <input type="checkbox"/> | <input type="checkbox"/> | n/a                                            |
| Sponsor                           | 5b | Provide name for the review funder and/or sponsor                                                                                                                                               | <input type="checkbox"/> | <input type="checkbox"/> | n/a                                            |
| Role of sponsor/funder            | 5c | Describe roles of funder(s), sponsor(s), and/or institution(s), if any, in developing the protocol                                                                                              | <input type="checkbox"/> | <input type="checkbox"/> | n/a                                            |
| <b>INTRODUCTION</b>               |    |                                                                                                                                                                                                 |                          |                          |                                                |

|                                    |     |                                                                                                                                                                                                                           |   |                          |                                 |
|------------------------------------|-----|---------------------------------------------------------------------------------------------------------------------------------------------------------------------------------------------------------------------------|---|--------------------------|---------------------------------|
| <b>Rationale</b>                   | 6   | Describe the rationale for the review in the context of what is already known                                                                                                                                             | √ | <input type="checkbox"/> | 4-7                             |
| <b>Objectives</b>                  | 7   | Provide an explicit statement of the question(s) the review will address with reference to participants, interventions, comparators, and outcomes (PICO)                                                                  | √ | <input type="checkbox"/> | 7                               |
| <b>METHODS</b>                     |     |                                                                                                                                                                                                                           |   |                          |                                 |
| <b>Eligibility criteria</b>        | 8   | Specify the study characteristics (e.g., PICO, study design, setting, time frame) and report characteristics (e.g., years considered, language, publication status) to be used as criteria for eligibility for the review | √ | <input type="checkbox"/> | 7-9                             |
| <b>Information sources</b>         | 9   | Describe all intended information sources (e.g., electronic databases, contact with study authors, trial registers, or other grey literature sources) with planned dates of coverage                                      | √ | <input type="checkbox"/> | 9-10                            |
| <b>Search strategy</b>             | 10  | Present draft of search strategy to be used for at least one electronic database, including planned limits, such that it could be repeated                                                                                | √ | <input type="checkbox"/> | Supplemental file – appendix 2b |
| <b>STUDY RECORDS</b>               |     |                                                                                                                                                                                                                           |   |                          |                                 |
| Data management                    | 11a | Describe the mechanism(s) that will be used to manage records and data throughout the review                                                                                                                              | √ | <input type="checkbox"/> | 10                              |
| Selection process                  | 11b | State the process that will be used for selecting studies (e.g., two independent reviewers) through each phase of the review (i.e., screening, eligibility, and inclusion in meta-analysis)                               | √ | <input type="checkbox"/> | 10                              |
| Data collection process            | 11c | Describe planned method of extracting data from reports (e.g., piloting forms, done independently, in duplicate), any processes for obtaining and confirming data from investigators                                      | √ | <input type="checkbox"/> | 11                              |
| <b>Data items</b>                  | 12  | List and define all variables for which data will be sought (e.g., PICO items, funding sources), any pre-planned data assumptions and simplifications                                                                     | √ | <input type="checkbox"/> | 7-8                             |
| <b>Outcomes and prioritization</b> | 13  | List and define all outcomes for which data will be sought, including prioritization of main and additional outcomes, with rationale                                                                                      | √ | <input type="checkbox"/> | 9                               |

|                                           |     |                                                                                                                                                                                                                                             |                          |                          |       |
|-------------------------------------------|-----|---------------------------------------------------------------------------------------------------------------------------------------------------------------------------------------------------------------------------------------------|--------------------------|--------------------------|-------|
| <b>Risk of bias in individual studies</b> | 14  | Describe anticipated methods for assessing risk of bias of individual studies, including whether this will be done at the outcome or study level, or both; state how this information will be used in data synthesis                        | √                        | <input type="checkbox"/> | 11-12 |
| <b>DATA</b>                               |     |                                                                                                                                                                                                                                             |                          |                          |       |
| <b>Synthesis</b>                          | 15a | Describe criteria under which study data will be quantitatively synthesized                                                                                                                                                                 | <input type="checkbox"/> | <input type="checkbox"/> | n/a   |
|                                           | 15b | If data are appropriate for quantitative synthesis, describe planned summary measures, methods of handling data, and methods of combining data from studies, including any planned exploration of consistency (e.g., $I^2$ , Kendall's tau) | <input type="checkbox"/> | <input type="checkbox"/> | n/a   |
|                                           | 15c | Describe any proposed additional analyses (e.g., sensitivity or subgroup analyses, meta-regression)                                                                                                                                         | <input type="checkbox"/> | <input type="checkbox"/> | n/a   |
|                                           | 15d | If quantitative synthesis is not appropriate, describe the type of summary planned                                                                                                                                                          | √                        | <input type="checkbox"/> | 11-12 |
| <b>Meta-bias(es)</b>                      | 16  | Specify any planned assessment of meta-bias(es) (e.g., publication bias across studies, selective reporting within studies)                                                                                                                 | <input type="checkbox"/> | <input type="checkbox"/> | n/a   |
| <b>Confidence in cumulative evidence</b>  | 17  | Describe how the strength of the body of evidence will be assessed (e.g., GRADE)                                                                                                                                                            | <input type="checkbox"/> | √                        |       |
