# Supplementary material for: Protocol for a systematic review of economic evaluations conducted on gender-transformative interventions aimed at preventing unintended pregnancy and promoting sexual health in adolescents
Source: HighWire-hosted journal article supplement (doi:10.1136/bmjopen-2021-056553), 2022-05-01
Supplement: bmjopen-2021-056553supp002_data_supplement.pdf [file bmjopen-2021-056553supp002_data_supplement.pdf]

Preliminary scoping search for ongoing and published related systematic reviews

**PROSPERO**

- #1 Adolescent\* OR boys OR girls 14711
- #2 unintended pregnancy OR reproductive health OR sexual health OR gender transformative intervention OR gender transformative approach 1215
- #3 economic evaluation OR cost effectiveness analysis OR cost utility analysis or cost benefit analysis OR cost minimisation analysis OR costing analysis OR cost consequence analysis 2103
- #4 #3 AND #2 AND #1 11

Of the 11 review titles, there was no completed or ongoing review that matched all aspects of our proposed systematic review.

**COCHRANE**

Advanced search

Adolescent\* OR boys OR girls in Title Abstract Keyword AND "unintended pregnancy" OR "reproductive health" OR "sexual health" OR "gender transformative intervention" OR "gender transformative approach" in Title Abstract Keyword AND "economic evaluation" OR "cost effectiveness analysis" OR "cost utility analysis" OR "cost benefit analysis" OR "cost minimisation analysis" OR "costing analysis" OR "cost consequence analysis" in Title Abstract Keyword

2 Cochrane reviews and 0 protocols were obtained in the search results. The reviews were for effectiveness studies and did not match the objectives of our proposed systematic review.

**PUBMED**

- #1 Adolescent\*[Title/Abstract] OR boys[Title/Abstract] OR girls[Title/Abstract] - 387 821
- #2 "unintended pregnancy"[Title/Abstract] OR "reproductive health"[Title/Abstract] OR "sexual health"[Title/Abstract] OR "gender transformative intervention"[Title/Abstract] OR "gender transformative approach"[Title/Abstract] - 31 170
- #3 "economic evaluation" OR "cost effectiveness analysis" OR "cost utility analysis" OR "cost benefit analysis" OR "cost minimisation analysis" OR "costing analysis" OR "cost consequence analysis" - 99 231
- #1 AND #2 AND #3 - 33
