# Supplementary material for: Protocol for a systematic review of economic evaluations conducted on gender-transformative interventions aimed at preventing unintended pregnancy and promoting sexual health in adolescents
Source: HighWire-hosted journal article supplement (doi:10.1136/bmjopen-2021-056553), 2022-05-01
Supplement: bmjopen-2021-056553supp004_data_supplement.pdf [file bmjopen-2021-056553supp004_data_supplement.pdf]

**APPENDIX 3****Draft data extraction form**

|                                                                                      |
|--------------------------------------------------------------------------------------|
| Date form completed:                                                                 |
| Name of reviewer extracting data:                                                    |
| <b>Study details</b>                                                                 |
| Study Title:                                                                         |
| Author and publication year:                                                         |
| Author contact details:                                                              |
| Study context:<br>- Healthcare, service delivery, social context<br>- Country        |
| Study objectives:                                                                    |
| Source of funding:                                                                   |
| Conflict of interest :                                                               |
| <b>Methods</b>                                                                       |
| Type of study<br>(i) For effectiveness data<br>(ii) Economic evaluation study design |
| Participants / population:                                                           |
| Types of Intervention(s):                                                            |
| Types of outcome measure                                                             |
| Decision:<br>- If excluded, give reason for exclusion                                |
| <b>DO NOT PROCEED IF STUDY IS EXCLUDED FROM THE REVIEW</b>                           |
| Perspective:                                                                         |
| Primary cost / consequences / outcome measures:                                      |
| Comparators:                                                                         |
| Time horizon:                                                                        |
| Discounting (if discounting was used, list the discount rates):                      |
| Currency:                                                                            |
| Data sources for costs:                                                              |
| Data sources for clinical data:                                                      |
| Data sources for utility data:                                                       |
| Was modelling used? If yes, state type of modelling:                                 |
| <b>Results</b>                                                                       |
| Costs / resources:                                                                   |
| Outcomes / benefits:                                                                 |
| Incremental cost effectiveness:                                                      |
| Analysis of uncertainty:                                                             |
| Author's conclusions:                                                                |
